# Supplementary material for: Deletion of endothelial leptin receptors in mice promotes diet-induced obesity
Source: PubMed Central journal article supplement (PMC10203363; doi:10.1038/s41598-023-35281-7), 2023-05-22

# Figure 1

**A**

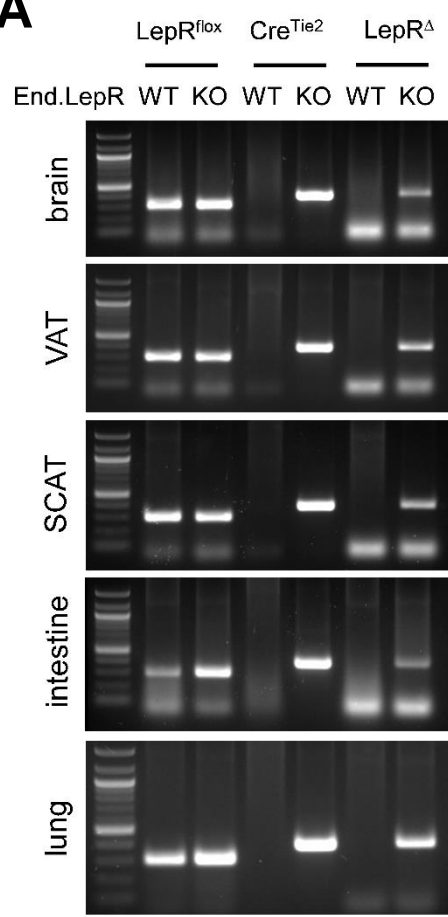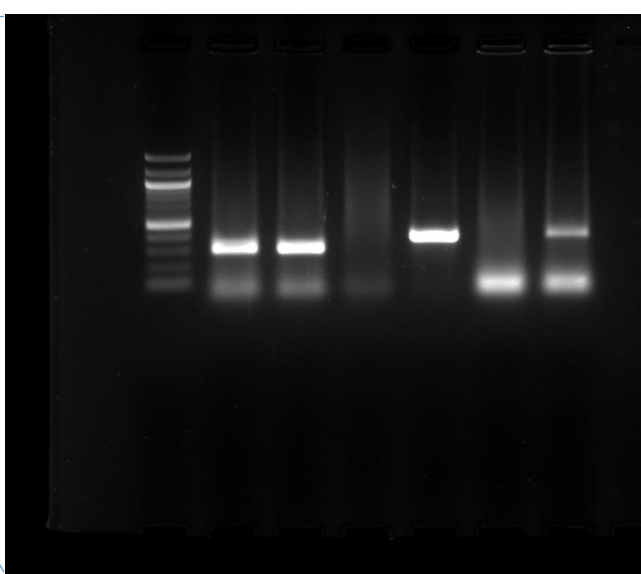

# Figure 1

**A**

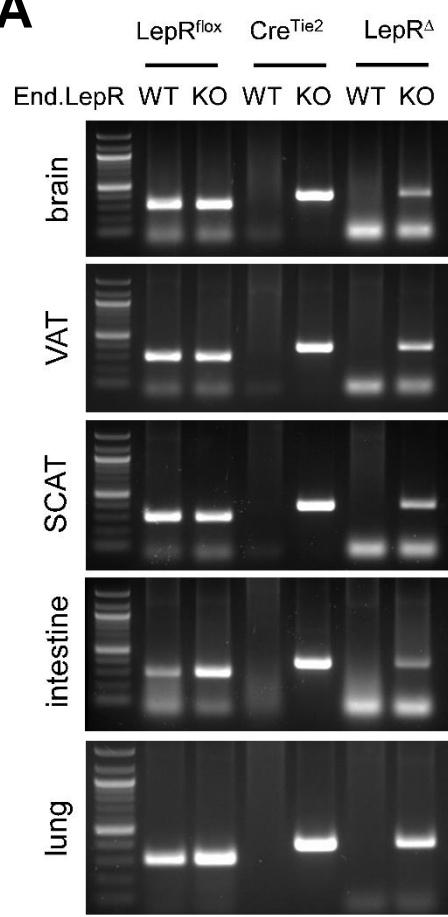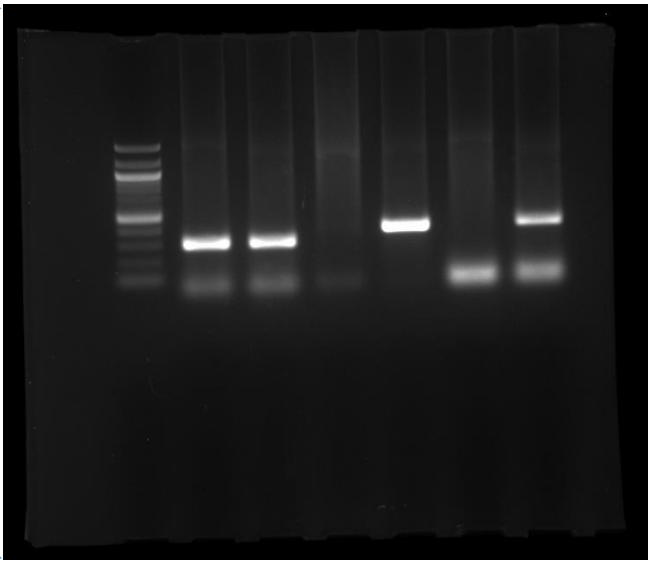

# Figure 1

**A**

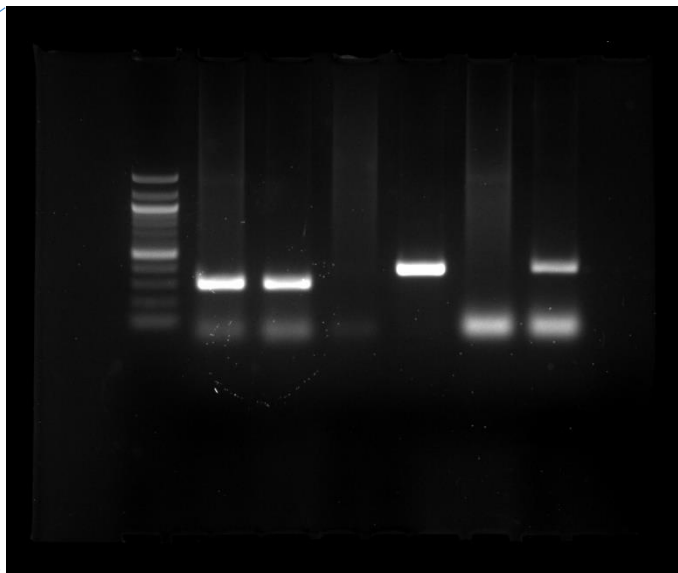

# Figure 1

**A**

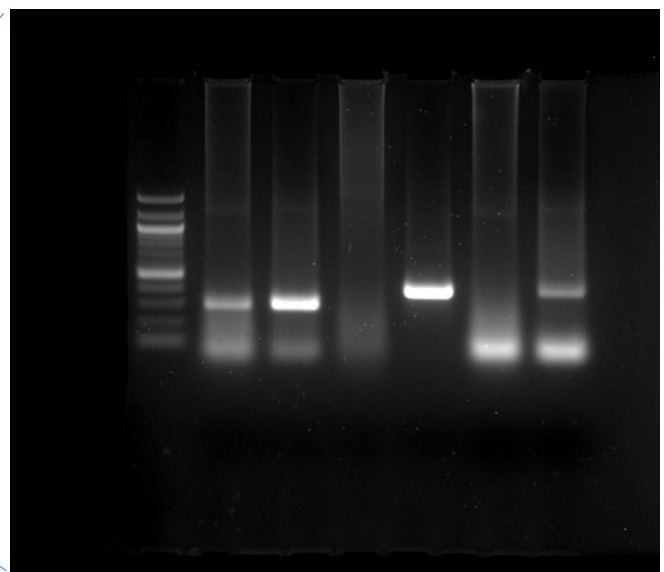

# Figure 1

**A**

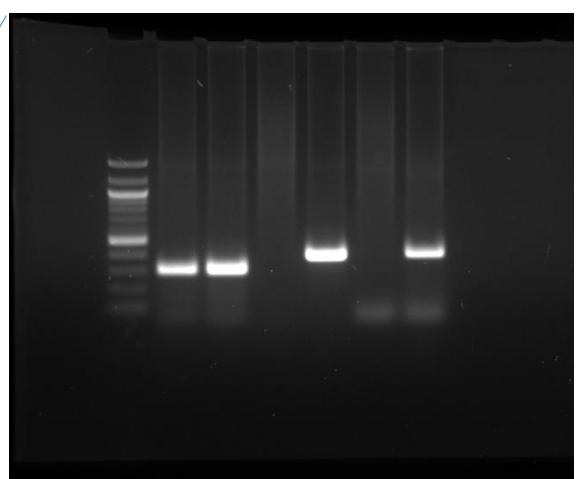

Supplement: 41598_2023_35281_MOESM2_ESM.pdf [file 41598_2023_35281_MOESM2_ESM.pdf]
